# Supplementary material for: Epigenetic alterations in cytochrome P450 oxidoreductase (Por) in sperm of rats exposed to tetrahydrocannabinol (THC)
Source: Springer Nature journal article supplement (doi:10.1038/s41598-020-69204-7), 2020-07-23
Supplement: MOESM1 [file 41598_2020_69204_MOESM1_ESM.pdf]

## **SUPPLEMENTAL MATERIALS**

### **Epigenetic Alterations in Cytochrome P450 Oxidoreductase (*Por*) in Sperm of Rats Exposed to Tetrahydrocannabinol (THC)**

Kelly S. Acharya, MD<sup>1</sup>; Rose Schrott, BS, MS<sup>2</sup>; Carole Grenier, BS<sup>1</sup>;  
Zhiqing Huang, MD, PhD<sup>1</sup>; Zade Holloway, PhD<sup>3</sup>; Andrew Hawkey, PhD<sup>3</sup>;  
Edward D. Levin, PhD<sup>2,3</sup>; \*Susan K. Murphy, PhD<sup>1</sup>.

<sup>1</sup>Department of Obstetrics and Gynecology, Duke University Medical Center, Durham, NC, USA; <sup>2</sup>Duke Nicholas School of the Environment, University Program in Environmental Health, Durham, NC, USA; <sup>3</sup>Department of Psychiatry and Behavioral Sciences, Duke University Medical Center, Durham, NC, USA.

\*Corresponding Author:

Susan K Murphy, PhD  
Duke University Medical Center  
701 West Main Street, Suite 510  
Durham, North Carolina 27701  
Phone 919.681.3423  
susan.murphy@duke.edu

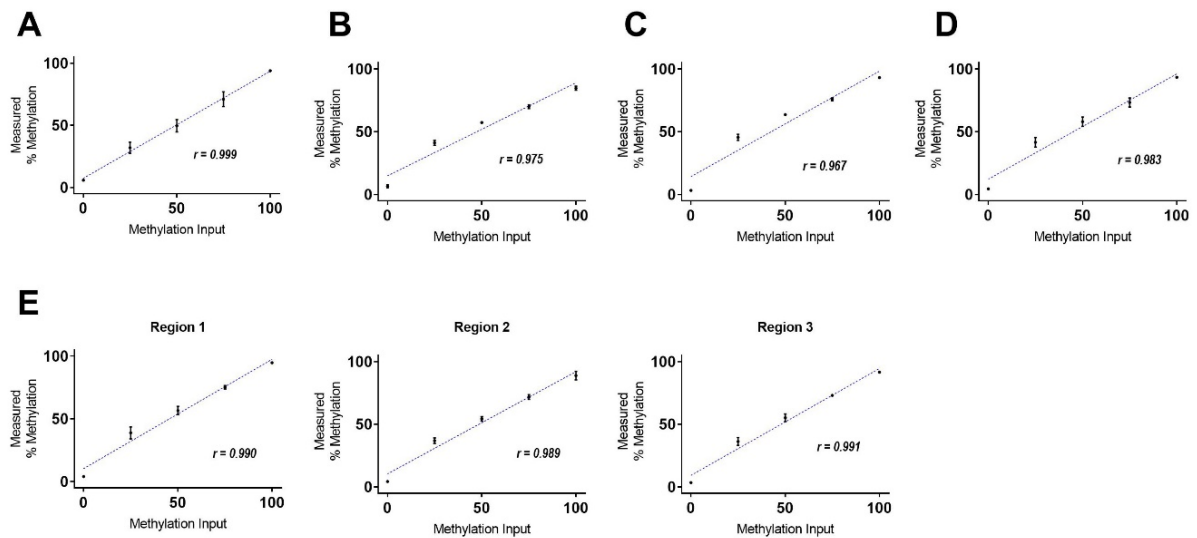

**Supplemental Figure 1.** Validation curves, showing the mean  $\pm$  SD for triplicate measures, for bisulfite pyrosequencing assays of *Adora2a* (A), *Cbx6* (B), *Hipk4* (C), *Mag* (D), and *Por* (three regions) (E). Graphs compare expected DNA methylation on the x axis (based on known methylation percentage of commercially-available unmethylated and methylated rat DNAs) and observed DNA methylation on the Y axis.

**Supplemental Table 1: PCR and Pyrosequencing Conditions**

| Gene           | Primer Sequences                                                                                                                                 | PCR Amplicon | PCR Conditions (touchdown annealing temperatures, in °C) |
|----------------|--------------------------------------------------------------------------------------------------------------------------------------------------|--------------|----------------------------------------------------------|
| <i>Adora2a</i> | F: (Btn)GGTTGATATTGTAGTGGGTGT<br>R: TCCAAAACCTACCCTCTATAC<br>S: AATCTAAACCTTATACAC                                                               | 250 bp       | 64-61-58                                                 |
| <i>Cbx6</i>    | F: GGGAAGTTTTGAGGTTTTATTT<br>R: (Btn)CAAACCAAATTACCCCTTATA<br>S: GTTTTAGTATTAGTGATGT                                                             | 232 bp       | 65-62-59                                                 |
| <i>Hipk4</i>   | F: AAGTTTTAGGAATGTAGAGAGT<br>R: (Btn)AATAACTACTTTAATAAAACCAACATA<br>S: ATTTGAGTTTGTAGGAGGT                                                       | 132 bp       | 61-59-56                                                 |
| <i>Mag</i>     | F: (Btn)TTGTTTTTATAATTTTTTTGGAAT<br>R: AATAAACTTAAACCTAACCCC<br>S: CTAAATACACAACTCCCTC                                                           | 220 bp       | 60-58-56                                                 |
| <i>Por</i>     | F: GTATTGGGATTGTTTTTTTATGG<br>R: (Btn)ACCTCACCTTATAAACCTACTCCC<br>S1: TTTTTTTTATGGGTTTTATT<br>S2: GTTTAGGTAAGGAGGTGG<br>S3: GTTAGGATGAGGATTATTTG | 293 bp       | 68-65-62                                                 |

F = forward primer, R = reverse primer, S = sequencing primer, Btn = Biotin label, bp = base pairs.
